# Supplementary material for: Brittle fracture in associative polymers: the case of ionomer melts
Source: Royal Society of Chemistry journal article supplement (doi:10.1039/c6sm01441k), 2016-01-01
Supplement: c6sm01441k1.bib [file c6sm01441k1.bib]

@misc{Agarwal,
  author        = {Abhinandan Agrawal},
  title         = {Surface Tension of Polymers},
  month         = {June},
  year          = {2005},
  publisher={Hatsopoulos Microfluids Laboratory, Department of Mechanical Engineering, Massachusetts Institute of Technology}
}


@article{qua,
author = {Osborne R. Quayle},
title = {The Parachors of Organic Compounds. An Interpretation and Catalogue.},
journal = {Chem. Rev.},
volume = {53},
number = {3},
pages = {439-589},
year = {1953},
doi = {10.1021/cr60166a003},

URL = { 
        http://dx.doi.org/10.1021/cr60166a003
    
},
eprint = { 
        http://dx.doi.org/10.1021/cr60166a003
    
}

}

@article{Chen2013,
author = {Chen, Quan and Tudryn, Gregory J and Colby, Ralph H},
file = {:C$\backslash$:/Users/aash/AppData/Local/Mendeley Ltd./Mendeley Desktop/Downloaded/Chen, Tudryn, Colby - 2013 - Ionomer dynamics and the sticky Rouse model a ).pdf:pdf},
journal = {J. Rheol.},
number = {August},
pages = {1441--1462},
title = {{Ionomer dynamics and the sticky Rouse model a )}},
volume = {16802},
year = {2013}
}

@article {kwok,
author = {Kwok, D. Y. and Cheung, L. K. and Park, C. B. and Neumann, A. W.},
title = {Study on the surface tensions of polymer melts using axisymmetric drop shape analysis},
journal = {Polym Eng \& Sci.},
volume = {38},
number = {5},
publisher = {Wiley Subscription Services, Inc., A Wiley Company},
issn = {1548-2634},
url = {http://dx.doi.org/10.1002/pen.10241},
doi = {10.1002/pen.10241},
pages = {757--764},
year = {1998},
}
