# Supplementary material for: Brittle fracture in associative polymers: the case of ionomer melts
Source: Royal Society of Chemistry journal article supplement (doi:10.1039/c6sm01441k), 2016-01-01
Supplement: c6sm01441k2.pdf [file c6sm01441k2.pdf]

## Supplementary material for 'Brittle fracture in associative polymers: the case of ionomer melts'

### 1 Crack propagation profile at $T = 80^\circ\text{C}$

Sequence of images of PTMO-Na ionomer filament undergoing uniaxial extensional deformation at a constant Hencky strain rate,  $\dot{\epsilon} = 1 \text{ s}^{-1}$  and  $T = 80^\circ\text{C}$ . The time specified is the time remaining to achieve complete brittle fracture of the filament.

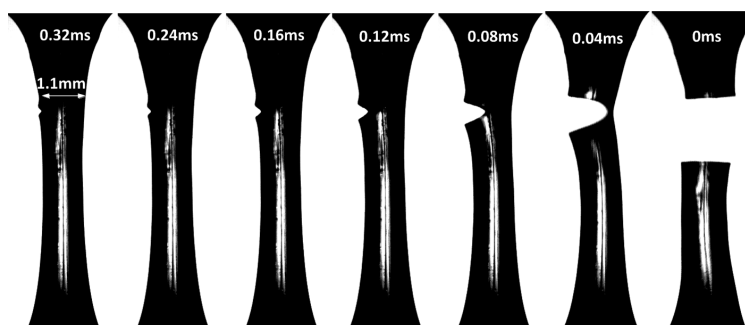

Figure 1: Crack propagation of PTMO-Na ionomer at  $T = 80^\circ\text{C}$ , and  $\dot{\epsilon} = 1 \text{ s}^{-1}$

Images of PTMO-Na ionomer filament showing multiple crack propagation.

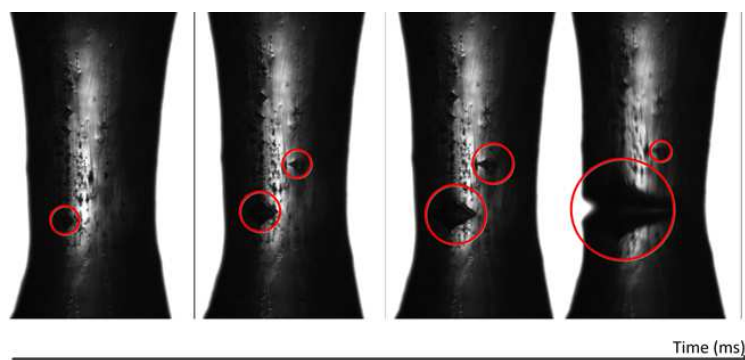

Figure 2: Sequence of images showing multiple cracks during stretching of PTMO-Na filament

### 2 Estimation of surface tension from parachors

Parachors signifies a function of chemical composition and is a useful means of estimating surface tension.<sup>1</sup> It can be represented by the following formula:

$$\gamma = \left(\frac{P_s}{V}\right)^4 \quad (1)$$

where  $\gamma$  is surface tension,  $P_s$  represent additive group contribution values and  $V$  is the molar volume.<sup>2</sup> For PTMO-Na ionomer  $P_s \approx 2004.8 (cm^3/mol)(erg/cm^2)^{1/4}$  as,

$$P_s = 44 \times C + 75 \times H + 15 \times O + 1 \times S + 1 \times Na + 5 \times \text{doublebond}$$

$$P_s = 44 \times 9 + 75 \times 15.5 + 15 \times 19.8 + 1 \times 49.1 + 1 \times 54.8 + 5 \times 17$$

$\rho \sim 0.994 g/cm^3$  at  $T = 20^\circ C$  which gives value of molar volume  $V = M/\rho = 903.4 cm^3/mol$  for molar mass  $M = 898 g/mol$ . Temperature dependence of surface tension is obtained using the following formula:

$$\gamma = \rho(293) \left(\frac{\rho(T)}{\rho(293)}\right)^4 \quad (2)$$

### 3 Estimation of surface energy from Eq. 12 in manuscript

Using Eq. 12 in the article, values of surface energy can be obtained and are plotted in Figure 3 along with the values of surface tension estimated in the above section.

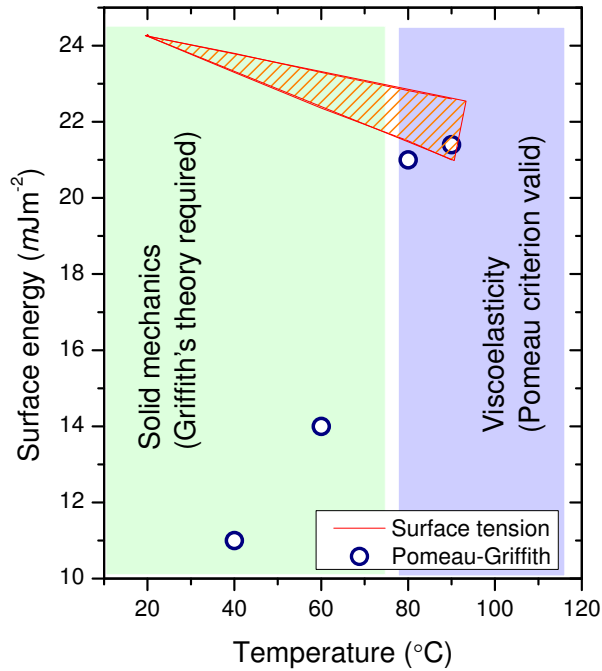

Figure 3: Surface tension as a function of temperature obtained using parachors shown in hatched region where the upper limit represents values assuming 0.25% decrease in density per 10 °C temperature increase<sup>4</sup> and the lower limit represents values assuming 0.5% decrease in density per 10 °C temperature increase. Open symbols represent estimate of surface energy using Griffith's theory by assuming energy barrier to be overcome by thermal fluctuations  $k_B T$

## References

- [1] Agrawal, A. Surface Tension of Polymers. 2005.
- [2] Quayle, O. R. The Parachors of Organic Compounds. An Interpretation and Catalogue. *Chem. Rev.* **1953**, *53*, 439–589.
- [3] Chen, Q.; Tudryn, G. J.; Colby, R. H. Ionomer dynamics and the sticky Rouse model a ). *J. Rheol.* **2013**, *16802*, 1441–1462.
- [4] Kwok, D. Y.; Cheung, L. K.; Park, C. B.; Neumann, A. W. Study on the surface tensions of polymer melts using axisymmetric drop shape analysis. *Polym Eng & Sci.* **1998**, *38*, 757–764.
